# Supplementary material
Source: publisher figshare collection journal article supplement (https://acs.figshare.com/ndownloader/files/3706816)
Supplement: Supplementary file 1 [file 3706816]

Target	Compound	SMILES	ka (1/(M*s))	kd (1/s)	Kd-SPR (M)	Kd-FTSA (M)
hCA I	1	NS(=O)(=O)C1=CC=C(C=C1)C(=O)CN1C=NC2=CC=CC=C12	2.00E+05	7.90E-03	3.70E-08	1.40E-08
hCA I	2	NS(=O)(=O)C1=C(Cl)C=C(C=C1)C(=O)CN1C=NC2=CC=CC=C12	3.30E+05	7.50E-03	2.20E-08	5.00E-09
hCA I	3	NS(=O)(=O)C1=CC=CC(=C1)C(=O)CN1C=NC2=CC=CC=C12	1.80E+04	7.90E-01	4.40E-05	1.70E-06
hCA I	4	NS(=O)(=O)C1=C(Cl)C=CC(=C1)C(=O)CN1C=NC2=CC=CC=C12				4.80E-06
hCA I	5	NS(=O)(=O)C1=C(Cl)C=CC(=C1)C(=O)CN1C(CC2=CC=CC=C2)=NC2=CC=CC=C12				2.20E-06
hCA I	6	NS(=O)(=O)C1=CC=C(C=C1)C(=O)CSC1=NC=CC=N1	2.00E+05	1.20E-02	6.30E-08	2.50E-08
hCA I	7	NS(=O)(=O)C1=C(Cl)C=C(C=C1)C(=O)CSC1=NC=CC=N1	3.10E+05	8.40E-03	2.70E-08	3.30E-09
hCA I	8	CC(C)(C)C1=CC(=O)NC(SCC(=O)C2=CC=C(C=C2)S(N)(=O)=O)=N1	6.30E+05	1.70E-03	2.60E-09	4.80E-10
hCA I	9	NS(=O)(=O)C1=CC=CC(=C1)C(=O)CSC1=NC=CC=N1	1.80E+05	2.10E-01	1.20E-06	3.30E-07
hCA I	10	NS(=O)(=O)C1=C(Cl)C=CC(=C1)C(=O)CSC1=NC=CC=N1	1.20E+05	4.30E-01	3.50E-06	1.80E-06
hCA I	11	NS(=O)(=O)C1=C(F)C(F)=C(SCCO)C(F)=C1F				3.30E-11
hCA I	12	NS(=O)(=O)C1=C(F)C(F)=C(SCCO)C(F)=C1NC1CCCCCCC1				9.10E-06
hCA I	13	NS(=O)(=O)C1=C(F)C(F)=C(C(NC2CCCCCCC2)=C1F)S(=O)(=O)CCO				3.30E-07
hCA I	14	CNC1=C(F)C(=C(F)C(F)=C1S(=O)(=O)CCC1=CC=CC=C1)S(N)(=O)=O	3.90E+05	1.00E-02	2.50E-08	2.50E-08
hCA I	15	CC(C)(C)NC1=C(F)C(=C(F)C(F)=C1S(=O)(=O)CCC1=CC=CC=C1)S(N)(=O)=O				2.20E-07
hCA I	16	NS(=O)(=O)C1=C(F)C(F)=C(N2CCCCC2)C(F)=C1F				2.90E-11
hCA I	17	COC1=CC=C(CNC2=C(C(F)=C(F)C(F)=C2F)S(N)(=O)=O)C=C1	1.10E+05	6.60E-03	6.10E-08	2.50E-08
hCA II	1	NS(=O)(=O)C1=CC=C(C=C1)C(=O)CN1C=NC2=CC=CC=C12				1.50E-09
hCA II	2	NS(=O)(=O)C1=C(Cl)C=C(C=C1)C(=O)CN1C=NC2=CC=CC=C12	7.70E+05	4.60E-03	6.00E-09	3.30E-09
hCA II	3	NS(=O)(=O)C1=CC=CC(=C1)C(=O)CN1C=NC2=CC=CC=C12	8.20E+05	6.20E-01	7.60E-07	1.70E-06
hCA II	4	NS(=O)(=O)C1=C(Cl)C=CC(=C1)C(=O)CN1C=NC2=CC=CC=C12	2.80E+05	1.50E-01	5.30E-07	5.90E-07
hCA II	5	NS(=O)(=O)C1=C(Cl)C=CC(=C1)C(=O)CN1C(CC2=CC=CC=C2)=NC2=CC=CC=C12	3.80E+05	1.30E-01	3.30E-07	6.70E-07
hCA II	6	NS(=O)(=O)C1=CC=C(C=C1)C(=O)CSC1=NC=CC=N1	1.60E+06	8.00E-03	5.20E-09	7.10E-09
hCA II	7	NS(=O)(=O)C1=C(Cl)C=C(C=C1)C(=O)CSC1=NC=CC=N1	3.90E+05	4.20E-03	1.10E-08	3.30E-09
hCA II	8	CC(C)(C)C1=CC(=O)NC(SCC(=O)C2=CC=C(C=C2)S(N)(=O)=O)=N1	6.40E+05	3.00E-02	4.70E-08	1.70E-08
hCA II	9	NS(=O)(=O)C1=CC=CC(=C1)C(=O)CSC1=NC=CC=N1	3.40E+05	1.80E-01	5.20E-07	4.30E-07
hCA II	10	NS(=O)(=O)C1=C(Cl)C=CC(=C1)C(=O)CSC1=NC=CC=N1	5.50E+05	7.30E-02	1.30E-07	1.40E-07
hCA II	11	NS(=O)(=O)C1=C(F)C(F)=C(SCCO)C(F)=C1F				9.10E-10
hCA II	12	NS(=O)(=O)C1=C(F)C(F)=C(SCCO)C(F)=C1NC1CCCCCCC1				4.50E-07
hCA II	13	NS(=O)(=O)C1=C(F)C(F)=C(C(NC2CCCCCCC2)=C1F)S(=O)(=O)CCO	8.60E+04	8.70E-03	1.00E-07	2.00E-08
hCA II	14	CNC1=C(F)C(=C(F)C(F)=C1S(=O)(=O)CCC1=CC=CC=C1)S(N)(=O)=O	1.30E+06	8.20E-03	6.40E-09	2.40E-09
hCA II	15	CC(C)(C)NC1=C(F)C(=C(F)C(F)=C1S(=O)(=O)CCC1=CC=CC=C1)S(N)(=O)=O				5.90E-10
hCA II	16	NS(=O)(=O)C1=C(F)C(F)=C(N2CCCCC2)C(F)=C1F	1.40E+06	9.30E-03	6.80E-09	4.50E-09
hCA II	17	COC1=CC=C(CNC2=C(C(F)=C(F)C(F)=C2F)S(N)(=O)=O)C=C1	3.90E+05	2.60E-02	6.60E-08	7.70E-08
hCA VII	1	NS(=O)(=O)C1=CC=C(C=C1)C(=O)CN1C=NC2=CC=CC=C12	8.10E+05	5.50E-03	6.80E-09	8.30E-09
hCA VII	2	NS(=O)(=O)C1=C(Cl)C=C(C=C1)C(=O)CN1C=NC2=CC=CC=C12	9.80E+05	1.70E-02	1.70E-08	1.50E-09
hCA VII	3	NS(=O)(=O)C1=CC=CC(=C1)C(=O)CN1C=NC2=CC=CC=C12	4.40E+05	6.50E-01	1.50E-06	2.90E-06
hCA VII	4	NS(=O)(=O)C1=C(Cl)C=CC(=C1)C(=O)CN1C=NC2=CC=CC=C12	1.60E+05	2.70E-01	1.70E-06	3.30E-07
hCA VII	5	NS(=O)(=O)C1=C(Cl)C=CC(=C1)C(=O)CN1C(CC2=CC=CC=C2)=NC2=CC=CC=C12	2.00E+05	6.10E-02	3.10E-07	9.10E-07
hCA VII	6	NS(=O)(=O)C1=CC=C(C=C1)C(=O)CSC1=NC=CC=N1	2.90E+06	2.20E-02	7.70E-09	2.00E-08
hCA VII	7	NS(=O)(=O)C1=C(Cl)C=C(C=C1)C(=O)CSC1=NC=CC=N1	3.70E+06	4.40E-02	1.20E-08	2.00E-09
hCA VII	8	CC(C)(C)C1=CC(=O)NC(SCC(=O)C2=CC=C(C=C2)S(N)(=O)=O)=N1	4.90E+05	2.50E-02	5.10E-08	1.30E-08
hCA VII	9	NS(=O)(=O)C1=CC=CC(=C1)C(=O)CSC1=NC=CC=N1	6.40E+05	1.4	2.20E-06	2.00E-06
hCA VII	10	NS(=O)(=O)C1=C(Cl)C=CC(=C1)C(=O)CSC1=NC=CC=N1	4.10E+05	1.50E-01	3.70E-07	3.10E-07
hCA VII	11	NS(=O)(=O)C1=C(F)C(F)=C(SCCO)C(F)=C1F	5.20E+06	3.30E-02	6.50E-09	3.30E-10
hCA VII	12	NS(=O)(=O)C1=C(F)C(F)=C(SCCO)C(F)=C1NC1CCCCCCC1	2.00E+04	1.00E-02	5.10E-07	7.40E-08
hCA VII	13	NS(=O)(=O)C1=C(F)C(F)=C(C(NC2CCCCCCC2)=C1F)S(=O)(=O)CCO	4.90E+04	2.00E-03	4.00E-08	3.20E-09
hCA VII	14	CNC1=C(F)C(=C(F)C(F)=C1S(=O)(=O)CCC1=CC=CC=C1)S(N)(=O)=O	2.90E+05	1.30E-02	4.50E-08	3.10E-09
hCA VII	15	CC(C)(C)NC1=C(F)C(=C(F)C(F)=C1S(=O)(=O)CCC1=CC=CC=C1)S(N)(=O)=O				7.70E-11
hCA VII	16	NS(=O)(=O)C1=C(F)C(F)=C(N2CCCCC2)C(F)=C1F	2.60E+06	7.10E-02	2.70E-08	5.90E-09
hCA VII	17	COC1=CC=C(CNC2=C(C(F)=C(F)C(F)=C2F)S(N)(=O)=O)C=C1	3.00E+04	1.40E-01	4.80E-06	2.50E-07
hCA IX	1	NS(=O)(=O)C1=CC=C(C=C1)C(=O)CN1C=NC2=CC=CC=C12	1.60E+06	5.90E-02	3.70E-08	1.80E-08
hCA IX	2	NS(=O)(=O)C1=C(Cl)C=C(C=C1)C(=O)CN1C=NC2=CC=CC=C12	3.10E+06	1.40E-01	4.70E-08	2.00E-08
hCA IX	3	NS(=O)(=O)C1=CC=CC(=C1)C(=O)CN1C=NC2=CC=CC=C12	1.30E+06	3.10E-01	2.40E-07	2.00E-07
hCA IX	4	NS(=O)(=O)C1=C(Cl)C=CC(=C1)C(=O)CN1C=NC2=CC=CC=C12	1.80E+06	8.40E-01	4.60E-07	3.00E-07
hCA IX	5	NS(=O)(=O)C1=C(Cl)C=CC(=C1)C(=O)CN1C(CC2=CC=CC=C2)=NC2=CC=CC=C12				4.00E-07
hCA IX	6	NS(=O)(=O)C1=CC=C(C=C1)C(=O)CSC1=NC=CC=N1	3.20E+06	2.10E-01	6.60E-08	8.30E-08
hCA IX	7	NS(=O)(=O)C1=C(Cl)C=C(C=C1)C(=O)CSC1=NC=CC=N1	1.80E+06	2.60E-01	1.50E-07	1.10E-07
hCA IX	8	CC(C)(C)C1=CC(=O)NC(SCC(=O)C2=CC=C(C=C2)S(N)(=O)=O)=N1	2.50E+06	8.40E-02	3.30E-08	1.10E-08
hCA IX	9	NS(=O)(=O)C1=CC=CC(=C1)C(=O)CSC1=NC=CC=N1	1.20E+06	3.10E-01	2.60E-07	3.30E-07
hCA IX	10	NS(=O)(=O)C1=C(Cl)C=CC(=C1)C(=O)CSC1=NC=CC=N1	2.00E+06	4.00E-01	2.00E-07	3.60E-07
hCA IX	11	NS(=O)(=O)C1=C(F)C(F)=C(SCCO)C(F)=C1F	9.20E+06	1.10E-01	1.10E-08	1.70E-09
hCA IX	12	NS(=O)(=O)C1=C(F)C(F)=C(SCCO)C(F)=C1NC1CCCCCCC1	2.90E+05	7.70E-03	2.70E-08	1.70E-10
hCA IX	13	NS(=O)(=O)C1=C(F)C(F)=C(C(NC2CCCCCCC2)=C1F)S(=O)(=O)CCO				6.70E-12
hCA IX	14	CNC1=C(F)C(=C(F)C(F)=C1S(=O)(=O)CCC1=CC=CC=C1)S(N)(=O)=O	6.50E+06	1.00E-01	1.60E-08	2.00E-09
hCA IX	15	CC(C)(C)NC1=C(F)C(=C(F)C(F)=C1S(=O)(=O)CCC1=CC=CC=C1)S(N)(=O)=O	7.00E+05	6.40E-03	9.20E-09	2.00E-10
hCA IX	16	NS(=O)(=O)C1=C(F)C(F)=C(N2CCCCC2)C(F)=C1F	1.50E+07	1.50E-01	1.00E-08	2.00E-08
hCA IX	17	COC1=CC=C(CNC2=C(C(F)=C(F)C(F)=C2F)S(N)(=O)=O)C=C1	1.80E+06	2.60E-01	1.50E-07	2.20E-08
hCA XII	1	NS(=O)(=O)C1=CC=C(C=C1)C(=O)CN1C=NC2=CC=CC=C12	2.80E+05	5.10E-02	1.90E-07	3.20E-07
hCA XII	2	NS(=O)(=O)C1=C(Cl)C=C(C=C1)C(=O)CN1C=NC2=CC=CC=C12	3.80E+05	1.70E-01	4.50E-07	3.30E-07
hCA XII	3	NS(=O)(=O)C1=CC=CC(=C1)C(=O)CN1C=NC2=CC=CC=C12	7.20E+04	5.12E-01	7.10E-06	4.30E-06
hCA XII	4	NS(=O)(=O)C1=C(Cl)C=CC(=C1)C(=O)CN1C=NC2=CC=CC=C12	1.60E+05	1.40E-01	9.00E-07	7.70E-07
hCA XII	5	NS(=O)(=O)C1=C(Cl)C=CC(=C1)C(=O)CN1C(CC2=CC=CC=C2)=NC2=CC=CC=C12	1.00E+05	2.00E-02	2.00E-07	3.00E-07
hCA XII	6	NS(=O)(=O)C1=CC=C(C=C1)C(=O)CSC1=NC=CC=N1	2.00E+07	2.7	1.40E-07	2.20E-07
hCA XII	7	NS(=O)(=O)C1=C(Cl)C=C(C=C1)C(=O)CSC1=NC=CC=N1	1.60E+06	3.20E-01	2.00E-07	3.30E-07
hCA XII	8	CC(C)(C)C1=CC(=O)NC(SCC(=O)C2=CC=C(C=C2)S(N)(=O)=O)=N1	4.00E+05	2.50E-02	6.30E-08	7.10E-08
hCA XII	9	NS(=O)(=O)C1=CC=CC(=C1)C(=O)CSC1=NC=CC=N1				1.30E-06
hCA XII	10	NS(=O)(=O)C1=C(Cl)C=CC(=C1)C(=O)CSC1=NC=CC=N1	8.80E+05	1.60E-01	1.80E-07	5.00E-07
hCA XII	11	NS(=O)(=O)C1=C(F)C(F)=C(SCCO)C(F)=C1F	1.30E+06	2.50E-02	1.90E-08	1.40E-08
hCA XII	12	NS(=O)(=O)C1=C(F)C(F)=C(SCCO)C(F)=C1NC1CCCCCCC1	1.30E+05	5.00E-02	4.00E-07	1.00E-07
hCA XII	13	NS(=O)(=O)C1=C(F)C(F)=C(C(NC2CCCCCCC2)=C1F)S(=O)(=O)CCO				1.10E-09
hCA XII	14	CNC1=C(F)C(=C(F)C(F)=C1S(=O)(=O)CCC1=CC=CC=C1)S(N)(=O)=O	1.50E+06	1.40E-01	9.50E-08	1.00E-07
hCA XII	15	CC(C)(C)NC1=C(F)C(=C(F)C(F)=C1S(=O)(=O)CCC1=CC=CC=C1)S(N)(=O)=O	1.80E+05	1.10E-02	5.9-8	1.70E-08
hCA XII	16	NS(=O)(=O)C1=C(F)C(F)=C(N2CCCCC2)C(F)=C1F	8.80E-05	4.10E-02	4.60E-08	3.30E-08
hCA XII	17	COC1=CC=C(CNC2=C(C(F)=C(F)C(F)=C2F)S(N)(=O)=O)C=C1				3.30E-07
hCA XIII	1	NS(=O)(=O)C1=CC=C(C=C1)C(=O)CN1C=NC2=CC=CC=C12	2.30E+05	5.70E-03	2.40E-08	3.30E-08
hCA XIII	2	NS(=O)(=O)C1=C(Cl)C=C(C=C1)C(=O)CN1C=NC2=CC=CC=C12	6.30E+05	2.00E-03	3.20E-09	8.00E-09
hCA XIII	3	NS(=O)(=O)C1=CC=CC(=C1)C(=O)CN1C=NC2=CC=CC=C12	9.30E+04	4.90E-02	5.20E-07	9.10E-07
hCA XIII	4	NS(=O)(=O)C1=C(Cl)C=CC(=C1)C(=O)CN1C=NC2=CC=CC=C12				1.10E-07
hCA XIII	5	NS(=O)(=O)C1=C(Cl)C=CC(=C1)C(=O)CN1C(CC2=CC=CC=C2)=NC2=CC=CC=C12	8.30E+04	4.30E-02	5.10E-07	1.80E-07
hCA XIII	6	NS(=O)(=O)C1=CC=C(C=C1)C(=O)CSC1=NC=CC=N1	2.80E+05	1.70E-02	6.10E-08	5.00E-08
hCA XIII	7	NS(=O)(=O)C1=C(Cl)C=C(C=C1)C(=O)CSC1=NC=CC=N1	7.20E+05	4.60E-03	6.40E-09	5.60E-09
hCA XIII	8	CC(C)(C)C1=CC(=O)NC(SCC(=O)C2=CC=C(C=C2)S(N)(=O)=O)=N1	2.40E+06	1.00E-02	4.20E-09	1.40E-09
hCA XIII	9	NS(=O)(=O)C1=CC=CC(=C1)C(=O)CSC1=NC=CC=N1	7.10E+04	5.10E-02	7.10E-07	5.00E-07
hCA XIII	10	NS(=O)(=O)C1=C(Cl)C=CC(=C1)C(=O)CSC1=NC=CC=N1	1.20E+05	2.20E-02	1.80E-07	1.40E-07
hCA XIII	11	NS(=O)(=O)C1=C(F)C(F)=C(SCCO)C(F)=C1F				5.30E-10
hCA XIII	12	NS(=O)(=O)C1=C(F)C(F)=C(SCCO)C(F)=C1NC1CCCCCCC1				3.30E-08
hCA XIII	13	NS(=O)(=O)C1=C(F)C(F)=C(C(NC2CCCCCCC2)=C1F)S(=O)(=O)CCO	5.10E+05	7.90E-03	1.50E-08	2.20E-09
hCA XIII	14	CNC1=C(F)C(=C(F)C(F)=C1S(=O)(=O)CCC1=CC=CC=C1)S(N)(=O)=O				4.20E-10
hCA XIII	15	CC(C)(C)NC1=C(F)C(=C(F)C(F)=C1S(=O)(=O)CCC1=CC=CC=C1)S(N)(=O)=O				1.50E-09
hCA XIII	16	NS(=O)(=O)C1=C(F)C(F)=C(N2CCCCC2)C(F)=C1F	9.20E+05	1.10E-02	1.10E-08	4.00E-09
hCA XIII	17	COC1=CC=C(CNC2=C(C(F)=C(F)C(F)=C2F)S(N)(=O)=O)C=C1	1.00E+05	2.20E-02	2.20E-07	5.00E-08
